# Supplementary material for: Self-assembly of SnO2 quantum dots into hierarchically ordered structures assisted by oriented attachment
Source: Royal Society of Chemistry journal article supplement (doi:10.1039/c4cp05057f), 2014-12-19
Supplement: c4cp05057f1.pdf [file c4cp05057f1.pdf]

## Supporting Information

### Self-assembly of SnO<sub>2</sub> dots into hierarchically ordered structure assisted by multistep oriented attachment

Zanyong Zhuang<sup>†</sup>, Xiaogang Xue<sup>†</sup>, Zhang Lin<sup>\*†</sup>

<sup>†</sup>State Key Laboratory of Structures, Fujian Institute of Research on the Structure of Matter, Chinese Academy of Sciences, Fuzhou, Fujian, 350002, China

\* To whom correspondence should be addressed.

E-mail: [zlin@fjirsm.ac.cn](mailto:zlin@fjirsm.ac.cn)

#### Experimental Section

**1.1 Materials and Reagents** Stannic chloride (SnCl<sub>4</sub>·5H<sub>2</sub>O), sodium hydroxide (NaOH) and ammonium hydroxide (NH<sub>3</sub>·H<sub>2</sub>O, 28 %) are of analytical grade. All chemicals were purchased from Alfa Aesar and used without further purification.

**1.2 Preparation of primary SnO<sub>2</sub> nanoparticles.** Using a typical procedure after minor modifications, SnO<sub>2</sub> nanoparticles were prepared by the hydrolysis of stannic chloride. To an aqueous solution of SnCl<sub>4</sub>·5H<sub>2</sub>O (30 g/L) was added NH<sub>3</sub>·H<sub>2</sub>O until pH value came to ~ 5. At room temperature, a white turbid suspension was produced immediately. No surfactant was used to minimize external effects on the crystal growth in the following. The suspension was centrifuged at the speed of 8000 rpm for 2 minutes. The white precipitate was washed repeatedly with distilled water till Cl<sup>-</sup> was beyond the detection by 0.1 M AgNO<sub>3</sub> solution. Finally, the product was dried under 80 °C for 48 h ( $Sn(OH)_4 \rightarrow SnO_2 + 2H_2O$ ) and ground into powder for kinetic measurements.

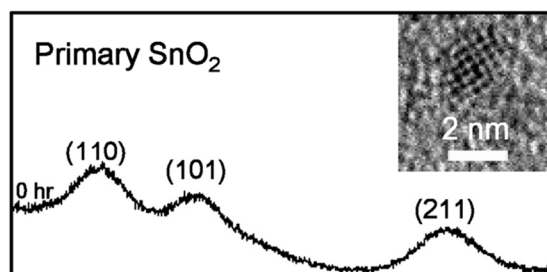

Figure S. XRD pattern and HRTEM image of as-synthesized SnO<sub>2</sub> nanoparticles.

Figure S shows the typical XRD pattern and HRTEM image of as-prepared SnO<sub>2</sub> nanoparticles. Primary nanoparticles are in tetragonal phase, with a calculated average size of  $\sim 1.9$  nm.

### 1.3 Growth kinetics of SnO<sub>2</sub> nanoparticles in NaOH solution.

An amount of primary SnO<sub>2</sub> (0.1 g) and distilled water (10 mL) were loaded into a Teflon-lined stainless steel autoclave with 23 mL capacity. Later, the autoclaves were put in a large oven under 250 °C for 50 h, by which SnO<sub>2</sub> nanocrystals grew to a limited size of 4-5 nm in water. The suspension was centrifuged at the speed of 8000 rpm for 2 minutes. The white precipitate was mixed with 1.2 M NaOH (10 mL). Later, the autoclaves were put in a large oven under 250 °C again. For the time series experiment, autoclave containers were taken out at the appropriate time interval, and quenched to room temperature with ice water immediately. The precipitates were centrifuged, wash by ethanol, dried and characterized by X-Ray Diffraction, (XRD), Transmission Electron Microscopy (TEM) and Scanning Electron Microscopy (SEM).

### 1.4 Characterization.

**XRD.** The crystal structures and the average sizes of samples were identified by a PANalytical X'Pert PRO diffractometer with Cu K $\alpha$  radiation (40 kV, 40 mA) in the continuous scanning mode. The scanning range of  $2\theta$  was from 15 ° to 75 ° in steps of 0.02 ° with a collection time of 100 s per step. The average crystallite size of nanocrystals was calculated from peak broadening by using the Scherrer equation.

**TEM and SEM.** To confirm the sizes and morphologies of SnO<sub>2</sub> nanoparticles, TEM and SEM images were taken on a JEOL JEM2010 at 5.0 kV and an JSM-6700F at 5.0 kV, respectively. All samples were prepared by depositing a drop of ethanol solution containing the nanocrystals onto holey carbon-coated grids.

## Results

**Table S1** Average particles size of SnO<sub>2</sub> nanocrystals along [110] and [002] directions, after coarsened in 1.2 M NaOH solution for 1.5, 24, 48 and 96 h, respectively.

| Time (h)   | 1.5  | 24   | 48   | 96   |
|------------|------|------|------|------|
| [110] (nm) | 5.0  | 5.1  | 5.5  | 5.4  |
| [002] (nm) | 14.8 | 25.8 | 29.1 | 36.0 |

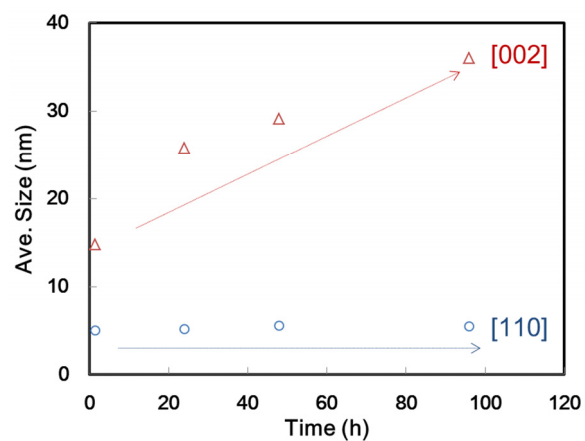

**Figure. S1** Experimental data showing the average size of SnO<sub>2</sub> nanocrystals along [110] and [002] directions, after coarsened in 1.2 M NaOH solution for 1.5, 24, 48 and 96 h, respectively.

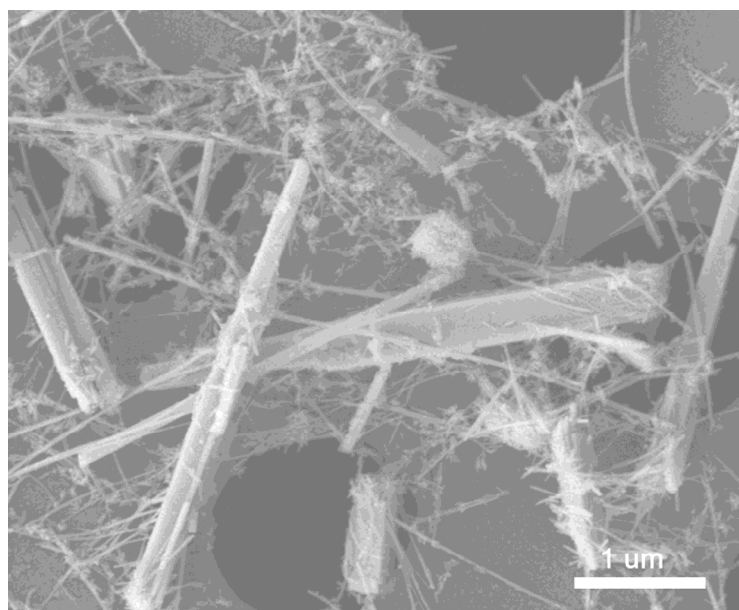

**Figure S2.** Typical SEM image of a big elongated SnO<sub>2</sub> crystal after coarsened in 1.2 M NaOH at 250 °C for 310 h.

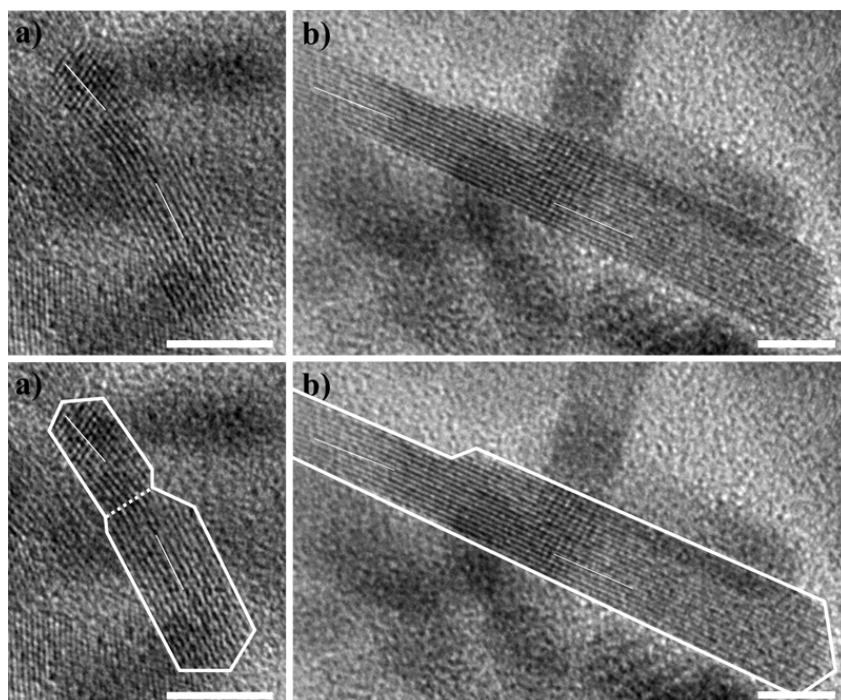

**Figure S3.** HRTEM images with lines to indicate the shape and interface positions, showing the growth trace of nanorods with common crystallographic orientation. Small SnO<sub>2</sub> nanorods as “building block” attached with each other via a common crystallographic orientation. The produced particles are with irregular shapes, exhibiting the character of crystal growth of nanowires by OA mechanism. Scale bars: 5nm.
